# Supplementary material for: The Effect of Necroptosis-related Gene Signature on the Progression, Prognosis, and Immune Microenvironment of Low-grade Glioma
Source: Research Square preprint supplement (doi:10.21203/rs.3.rs-1156900/v1), 2021-12-13
Supplement: Supplementary file 1 [file 3dfa31ee3217a67f3499da90.xlsx]

## Sheet: Sheet1
immune	pvalue
B cell_TIMER	1.44595e-06
T cell CD4+_TIMER	1.44741e-14
Neutrophil_TIMER	2.98754e-15
Macrophage_TIMER	4.84152e-17
Myeloid dendritic cell_TIMER	1.52329e-23
B cell plasma_CIBERSORT	9.88808e-11
T cell CD4+ naive_CIBERSORT	2.32511e-05
T cell CD4+ memory resting_CIBERSORT	5.32294e-06
T cell follicular helper_CIBERSORT	0.000123895
T cell regulatory (Tregs)_CIBERSORT	0.0169076
NK cell resting_CIBERSORT	0.0247325
Macrophage M0_CIBERSORT	0.0089842
Macrophage M1_CIBERSORT	0.0163966
Macrophage M2_CIBERSORT	1.87541e-07
Mast cell activated_CIBERSORT	0.000223042
Mast cell resting_CIBERSORT	0.00373059
Neutrophil_CIBERSORT	0.00484453
B cell plasma_CIBERSORT-ABS	3.34302e-05
T cell CD8+_CIBERSORT-ABS	0.0224212
T cell CD4+ naive_CIBERSORT-ABS	7.98555e-05
T cell CD4+ memory resting_CIBERSORT-ABS	2.69761e-11
T cell regulatory (Tregs)_CIBERSORT-ABS	0.00765245
NK cell resting_CIBERSORT-ABS	0.00586636
NK cell activated_CIBERSORT-ABS	0.0202088
Monocyte_CIBERSORT-ABS	0.00170241
Macrophage M0_CIBERSORT-ABS	0.00888061
Macrophage M1_CIBERSORT-ABS	0.000374069
Macrophage M2_CIBERSORT-ABS	2.26568e-15
Mast cell activated_CIBERSORT-ABS	2.99796e-05
Neutrophil_CIBERSORT-ABS	0.000316714
B cell_QUANTISEQ	0.0141727
Macrophage M1_QUANTISEQ	9.1656e-12
Macrophage M2_QUANTISEQ	2.30289e-19
Monocyte_QUANTISEQ	1.23228e-08
NK cell_QUANTISEQ	2.34647e-07
Myeloid dendritic cell_QUANTISEQ	3.92563e-06
uncharacterized cell_QUANTISEQ	0.000406577
T cell CD8+_MCPCOUNTER	4.08414e-05
cytotoxicity score_MCPCOUNTER	4.23362e-08
B cell_MCPCOUNTER	0.00153722
Monocyte_MCPCOUNTER	0.0152731
Macrophage/Monocyte_MCPCOUNTER	0.0152731
Myeloid dendritic cell_MCPCOUNTER	1.91731e-09
Neutrophil_MCPCOUNTER	0.0134784
Endothelial cell_MCPCOUNTER	0.00237819
Cancer associated fibroblast_MCPCOUNTER	2.5387e-14
Myeloid dendritic cell activated_XCELL	5.3151e-09
B cell_XCELL	0.000715491
Common lymphoid progenitor_XCELL	4.36566e-21
Endothelial cell_XCELL	2.01736e-06
Cancer associated fibroblast_XCELL	0.00671295
Hematopoietic stem cell_XCELL	2.01077e-06
Macrophage_XCELL	9.05537e-15
Macrophage M1_XCELL	1.95672e-14
Macrophage M2_XCELL	3.03053e-07
Mast cell_XCELL	0.0271823
Monocyte_XCELL	6.0782e-09
T cell NK_XCELL	0.00274701
B cell plasma_XCELL	2.45918e-10
T cell CD4+ Th1_XCELL	0.000421046
T cell CD4+ Th2_XCELL	0.0256153
immune score_XCELL	5.17733e-13
stroma score_XCELL	2.2097e-08
microenvironment score_XCELL	7.2092e-16
B cell_EPIC	3.27144e-11
Cancer associated fibroblast_EPIC	0.000168379
T cell CD4+_EPIC	7.61136e-09
T cell CD8+_EPIC	0.00236776
Endothelial cell_EPIC	1.09254e-06
Macrophage_EPIC	2.08869e-09
NK cell_EPIC	2.32202e-08
