# Supplementary material for: The Effect of Necroptosis-related Gene Signature on the Progression, Prognosis, and Immune Microenvironment of Low-grade Glioma
Source: Research Square preprint supplement (doi:10.21203/rs.3.rs-1156900/v1), 2021-12-13
Supplement: Supplementary file 2 [file 568fffa3c3779bd61af4742c.xlsx]

## Sheet: Sheet1
gene	conMean	treatMean	logFC	pValue	fdr
BID	8.01006	17.287	1.1098	0.00119058	0.00753369
CAMK2A	219.554	31.1097	-2.81914	0.000769793	0.00614215
CAMK2B	56.5867	10.0735	-2.4899	0.000407396	0.00614215
CAPN2	10.2864	23.2957	1.17933	0.000222063	0.00614215
CASP1	0.788254	2.53015	1.68249	0.012781	0.0312306
IFNA13	0.0530094	0.00735884	-2.8487	0.000277282	0.00614215
IFNA2	0.0753838	0.00645523	-3.54572	0.000403478	0.00614215
IFNA21	0.1099	0.0319134	-1.78396	0.00562035	0.018014
IFNA6	0.0758297	0.00783146	-3.27541	2.68e-05	0.00334654
IFNA8	0.0224626	0.00420875	-2.41606	0.00358698	0.0140116
IFNAR2	1.77824	3.61744	1.02452	0.000368807	0.00614215
IL1A	1.34015	0.414074	-1.69444	0.0138668	0.0327046
IL33	4.40399	12.0702	1.45457	0.00700574	0.0210891
H2AFY2	6.4495	18.6356	1.5308	0.00619382	0.0193557
MAPK9	21.6311	7.9248	-1.44866	0.00032995	0.00614215
PLA2G4D	0.0676769	0.0140172	-2.27146	0.00125155	0.00753369
PLA2G4E	0.0140016	0.00461264	-1.60193	0.00427683	0.0157125
PYGL	1.67767	5.55815	1.72815	0.00513416	0.0171958
SLC25A31	0.0353094	0.00988354	-1.83695	0.00100105	0.00736063
STAT4	2.93161	0.638695	-2.19849	0.0017979	0.00977121
TLR3	0.381682	1.25988	1.72285	0.00227441	0.0111487
TLR4	3.31153	9.57285	1.53145	0.0164157	0.0353786
TNFRSF10B	2.04086	5.64752	1.46844	0.00250512	0.0114007
TEAD1	3.19295	11.781	1.8835	0.000235128	0.00614215
HIST3H2A	8.11202	18.2598	1.17054	0.0162855	0.0353786
