# Supplementary material for: The Effect of Necroptosis-related Gene Signature on the Progression, Prognosis, and Immune Microenvironment of Low-grade Glioma
Source: Research Square preprint supplement (doi:10.21203/rs.3.rs-1156900/v1), 2021-12-13
Supplement: Supplementary file 3 [file 8fd8f04d34633f945f335607.xlsx]

## Sheet: Sheet1
AIFM1
ALOX15
BAX
BCL2
BID
BIRC2
BIRC3
CAMK2A
CAMK2B
CAMK2D
CAMK2G
CAPN1
CAPN2
CASP1
CASP8
CFLAR
CHMP1A
CHMP1B
CHMP2A
CHMP2B
CHMP3
CHMP4A
CHMP4B
CHMP4C
CHMP5
CHMP6
CHMP7
CYBB
CYLD
DNM1L
EIF2AK2
FADD
FAF1
FAS
FASLG
FTH1
FTL
GLUD1
GLUD2
GLUL
H2AFB1
H2AFB2
H2AFB3
HIST1H2AA
HIST1H2AG
HIST1H2AH
HIST1H2AI
HIST1H2AJ
HIST1H2AL
HIST1H2AM
HIST2H2AA3
HIST2H2AA4
HIST2H2AC
HIST2H2AB
HIST1H2AB
HIST1H2AC
HIST1H2AD
HIST1H2AE
H2AFJ
H2AFX
H2AFZ
H2AFV
HMGB1
HSP90AA1
HSP90AB1
IFNA1
IFNA10
IFNA13
IFNA14
IFNA16
IFNA17
IFNA2
IFNA21
IFNA4
IFNA5
IFNA6
IFNA7
IFNA8
IFNAR1
IFNAR2
IFNB1
IFNG
IFNGR1
IFNGR2
IL1A
IL1B
IL33
IRF9
JAK1
JAK2
JAK3
JMJD7-PLA2G4B
H2AFY
H2AFY2
MAPK10
MAPK8
MAPK9
NLRP3
PARP1
PGAM5
PLA2G4A
PLA2G4B
PLA2G4C
PLA2G4D
PLA2G4E
PLA2G4F
PPIA
PPID
PYCARD
PYGB
PYGL
PYGM
RBCK1
RIPK1
RIPK3
RNF103-CHMP3
RNF31
SHARPIN
SLC25A31
SLC25A4
SLC25A5
SLC25A6
SMPD1
SPATA2
SPATA2L
SQSTM1
STAT1
STAT2
STAT3
STAT4
STAT5A
STAT5B
STAT6
TICAM1
TICAM2
TLR3
TLR4
TNF
TNFAIP3
TNFRSF10A
TNFRSF10B
TNFRSF1A
TNFSF10
TRADD
TRAF2
TRAF5
TRPM7
TYK2
USP21
VDAC1
VDAC2
VDAC3
VPS4A
VPS4B
XIAP
ZBP1
USP22
MLKL
TEAD1
HIST1H2AK
HIST3H2A
